# Supplementary material
Source: HighWire-hosted journal article supplement (https://gut.bmj.com/content/71/8/1459)
Supplement: inline-supplementary-material-1 [file inline-supplementary-material-1.pdf]

| <b>GRADE – strength of evidence</b>                                                                                                                              | <b>GRADE – strength of recommendation</b>                                                                                                                                                 |
|------------------------------------------------------------------------------------------------------------------------------------------------------------------|-------------------------------------------------------------------------------------------------------------------------------------------------------------------------------------------|
| <i>High quality:</i> Further research is very unlikely to change confidence of the estimate                                                                      | <i>The trade-offs:</i> Taking into account the estimated size of the effect for main outcomes, the confidence limits around those estimates and the relative value placed on each outcome |
| <i>Moderate quality:</i> Further research is likely to have an impact on confidence in the estimate of effect and may change the estimate                        | <i>The quality of the evidence</i>                                                                                                                                                        |
| <i>Low quality:</i> Further research is very likely to have an important impact on confidence in the estimate of the effect and is likely to change the estimate | <i>Translation of the evidence into practice in a particular setting:</i> Taking into consideration important factors that could be expected to modify the size of expected effects       |
| <i>Very low quality:</i> Any estimate of effect is uncertain                                                                                                     | <i>Uncertainty about the baseline risk for the population of interest</i>                                                                                                                 |
