# Supplementary material
Source: HighWire-hosted journal article supplement (https://gut.bmj.com/content/71/8/1459)
Supplement: inline-supplementary-material-3 [file inline-supplementary-material-3.pdf]

| Author | Competing interests                                                                                                                                                                                                                                                                  |
|--------|--------------------------------------------------------------------------------------------------------------------------------------------------------------------------------------------------------------------------------------------------------------------------------------|
| AD     | Consultancy fees, honoraria, speaker fees and financial/ hospitality support to attend conferences from Takeda, Janssen, Dr Falk Pharma, Pharmacosmos, Pfizer UK, Tillotts UK, Celltrion UK, GI UK.                                                                                  |
| HNH    | Advisory board & Sponsored Speaker-Dr Falk Pharma.                                                                                                                                                                                                                                   |
| SA     | Advisory board - Dr Falk Pharma, Regeneron-Sanofi, Astra Zeneca and Eso-Cap. Sponsored speaker – Medtronic, Dr Falk Pharma, Vifol Pharma and Rafa Pharma.                                                                                                                            |
| MA     | Honoraria, speaker fees and financial/ hospitality support to attend conferences from Nutricia, Mead Johnson, Dr Falk Pharma, AbbVie, Abbott.                                                                                                                                        |
| JD     | Advisory board & Sponsored Speaker-Dr Falk Pharma.                                                                                                                                                                                                                                   |
| RS     | Advisory board & Sponsored Speaker-Dr Falk Pharma, Medtronic.                                                                                                                                                                                                                        |
| DM     | Advisory board & Sponsored Speaker-Dr Falk Pharma.                                                                                                                                                                                                                                   |
| JE     | Advisory board & Sponsored Speaker-Dr Falk Pharma.                                                                                                                                                                                                                                   |
| MN     | No conflicts of interest declared                                                                                                                                                                                                                                                    |
| HH     | No conflicts of interest declared                                                                                                                                                                                                                                                    |
| AC     | Advisory board – Astra Zeneca, Regeneron-Sanofi, Dr Falk Pharma. Sponsored speaker – AVIR, Dr Falk-Pharma                                                                                                                                                                            |
| SH     | No conflicts of interest declared                                                                                                                                                                                                                                                    |
| JH     | Advisory board & Sponsored Speaker-Dr Falk Pharma.                                                                                                                                                                                                                                   |
| KK     | No conflicts of interest declared                                                                                                                                                                                                                                                    |
| AM     | No conflicts of interest declared                                                                                                                                                                                                                                                    |
| CR     | No conflicts of interest declared                                                                                                                                                                                                                                                    |
| SS     | Advisory board & Sponsored Speaker-Dr Falk Pharma.                                                                                                                                                                                                                                   |
| PT     | Personal fees from Aimmune Therapeutics, DBV Technologies, Allergenis, and UK Food Standards Agency; grants from National Institute for Health Research (NIHR)/Imperial Biomedical Research Centre, UK Medical Research Council, UK Food Standards Agency, Jon Moulton Charity Trust |
| NT     | Advisory board, Research Support & Sponsored Speaker-Dr Falk Pharma.                                                                                                                                                                                                                 |
